# Supplementary material for: Covalent surface modification of nickel ferrite nanoparticles for electrochemical supercapacitor performance
Source: Royal Society of Chemistry journal article supplement (doi:10.1039/d2nj05566j), 2023-01-01
Supplement: d2nj05566j1.pdf [file d2nj05566j1.pdf]

## New Journal of Chemistry

### *Supporting Information*

# Covalent surface modification of nickel ferrite nanoparticles for electrochemical supercapacitor performance

Neha Singh,<sup>[a]</sup> Ankur Malik,<sup>[a]</sup> Shakshi Nohwar,<sup>[a],[b]</sup> Rathin Jana,<sup>[c]</sup> and Prakash Chandra Mondal,<sup>\*[a]</sup>

---

[a] Neha Singh, Dr. Ankur Malik, Shakshi Nohwar, Dr. P. C. Mondal  
Department of Chemistry  
Indian Institute of Technology Kanpur, Uttar Pradesh-208016, India  
E-mail: pcmondal@iitk.ac.in (PCM)

[b] Shakshi Nohwar  
Department of Chemistry  
National Institute of Technology Sikkim  
Barfung Block Ravangla Sub-Division  
South Sikkim - 737 139

[c] Dr. Rathin Jana  
Department of Chemistry  
Shahid Matangini Hazra Govt. General Degree College for Women (affiliated with Vidyasagar University)  
Tamluk, Purba Medinipur, West Bengal, 721 649

## Contents

|                                                       |    |
|-------------------------------------------------------|----|
| 1. FTIR spectra                                       | S2 |
| 2. Elemental mapping                                  | S2 |
| 3. Histogram of particle size                         | S3 |
| 4. Circuit of NF, NF-Ph-NO <sub>2</sub> , NF-Ph-SH    | S3 |
| 5. Table S1                                           | S4 |
| 6. Bode plot for NF, NF-Ph-NO <sub>2</sub> , NF-Ph-SH | S4 |
| 7. Electrochemical study of nickel foam               | S5 |
| 8. FESEM images after 2000 CV cycles                  | S5 |
| 9. PXRD patterns after 2000 CV cycles                 | S6 |

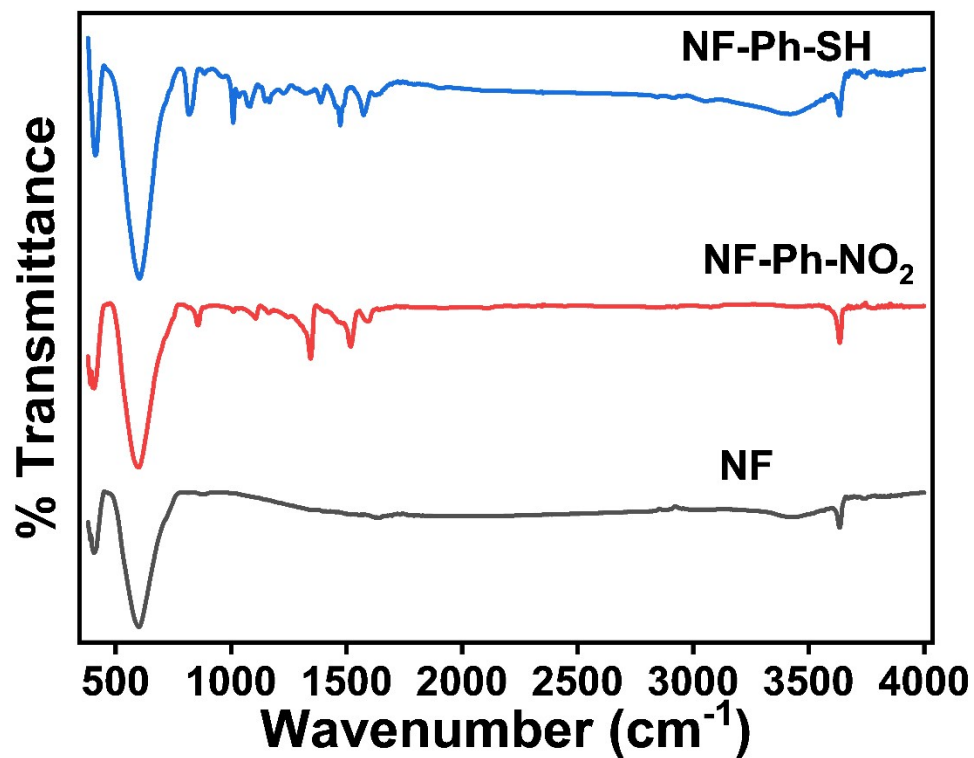

Fig. S1. FT-IR spectrum of NF, NF-Ph-NO<sub>2</sub> and NF-Ph-SH.

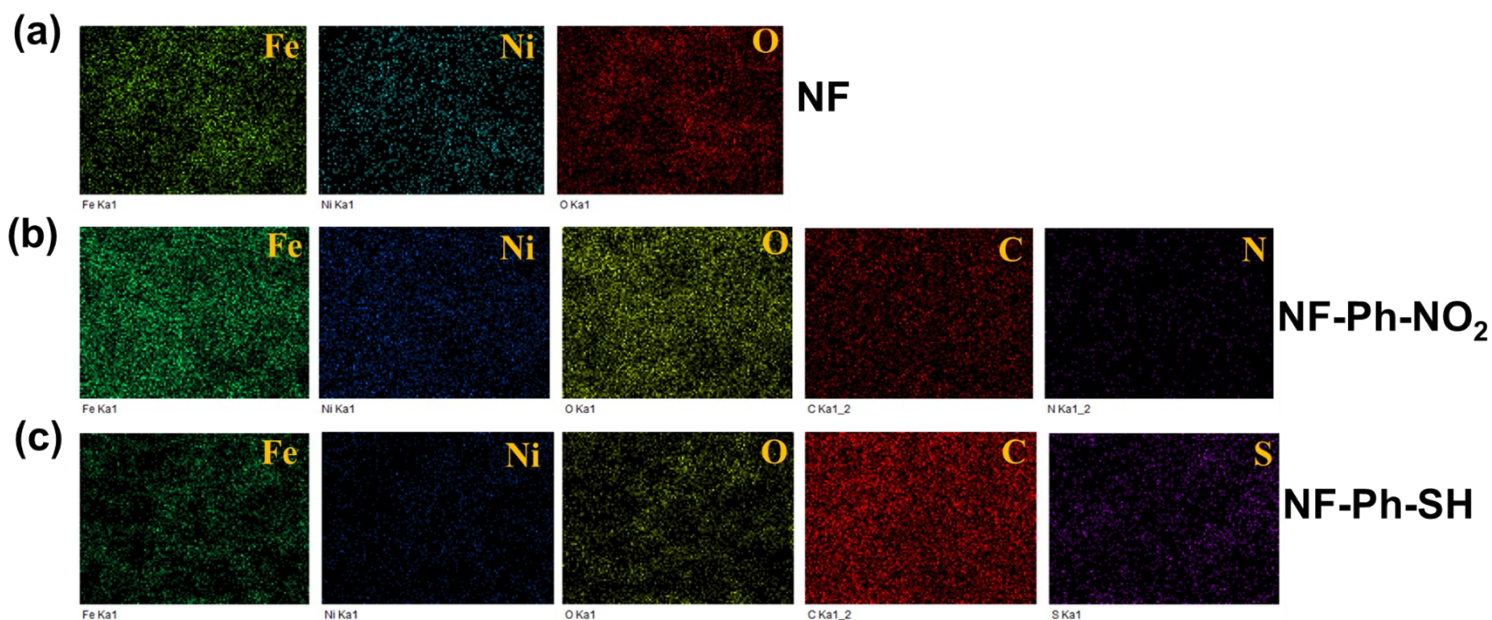

Fig. S2. EDAS Elemental mapping of (a) NF (b) NF-Ph-NO<sub>2</sub> (c) NF-Ph-SH.

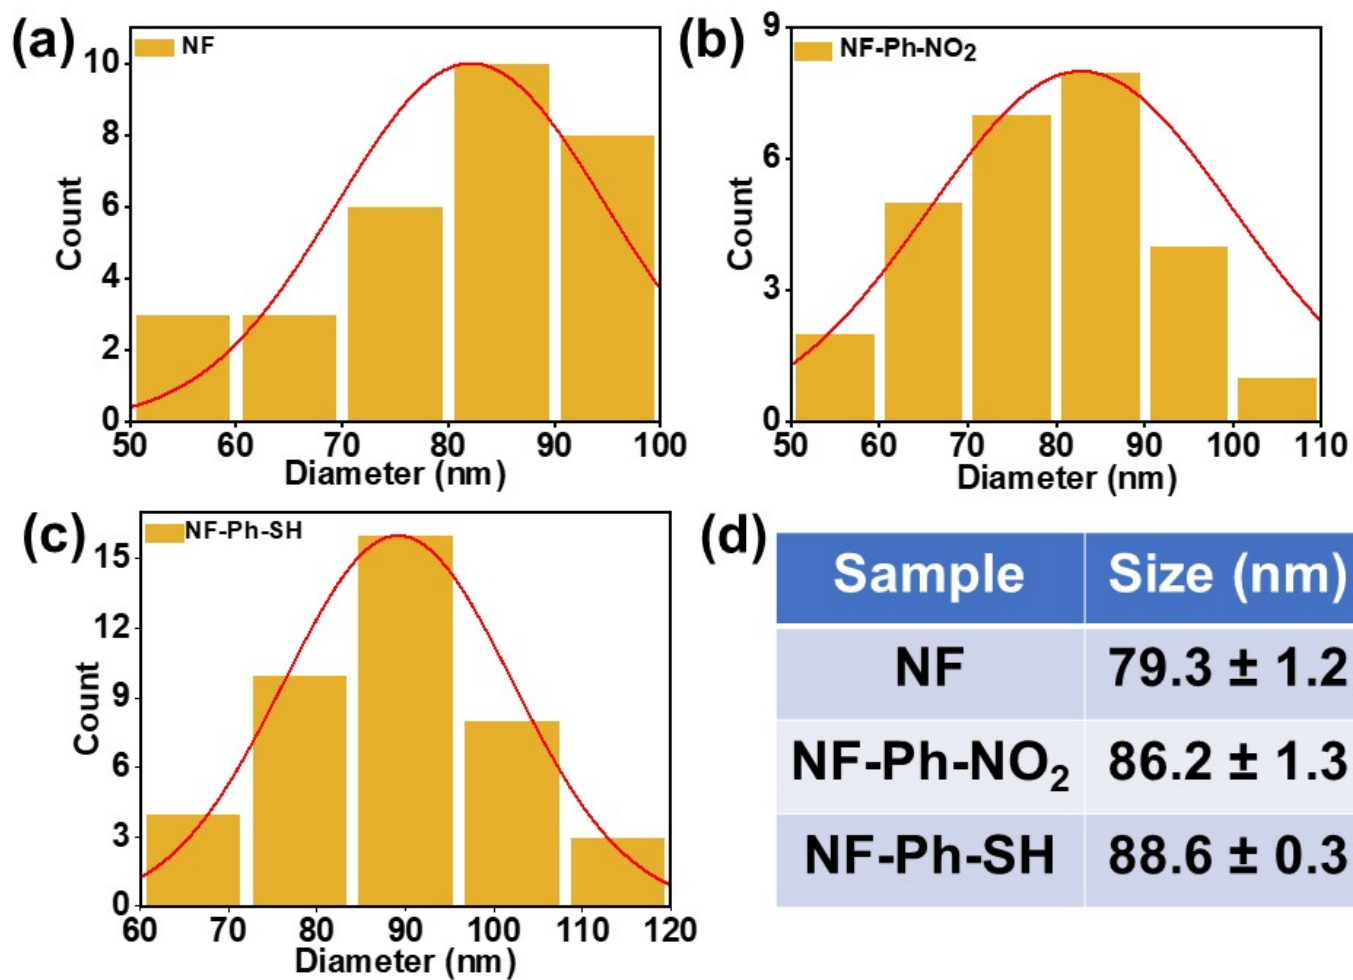

Fig. S3. Histogram of the particle size distribution of (a) NF (b) NF-Ph-NO<sub>2</sub> (c) NF-Ph-SH (d) table for particle size.

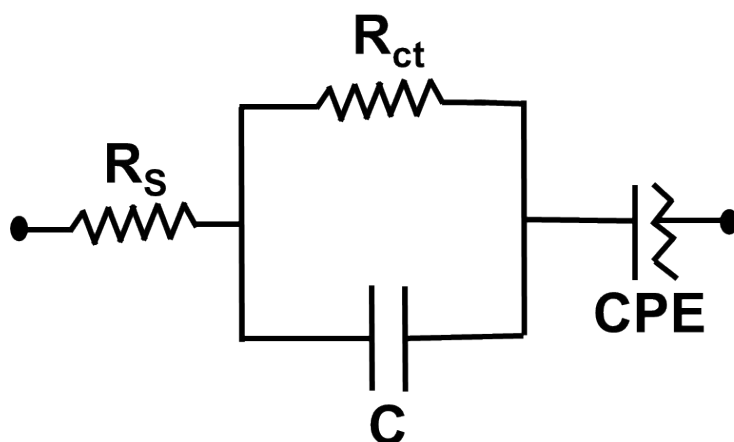

**Fig. S4.** Equivalent circuit diagram used for fitting NF, NF-Ph-NO<sub>2</sub>, NF-Ph-SH modify nickel foam electrode.

**Table S1.** Value of solution resistance ( $R_s$ ), capacitance ( $C$ ), charge transfer resistance ( $R_{ct}$ ), and constant phase element (CPE) of (a) NF (b) NF-Ph-NO<sub>2</sub>, and (c) NF-Ph-SH.

| Sample                | $R_s$ (Ohm) | $C$ (mf) | $R_{ct}$ (ohm) | CPE              |
|-----------------------|-------------|----------|----------------|------------------|
| NF                    | 3.2         | 2.47     | 520            | Y0=3.87<br>N=0.7 |
| NF-Ph-NO <sub>2</sub> | 2.9         | 8.50     | 310            | Y0=2.74<br>N=0.7 |
| NF-Ph-SH              | 0.4         | 10.73    | 278            | Y0=1.97<br>N=0.8 |

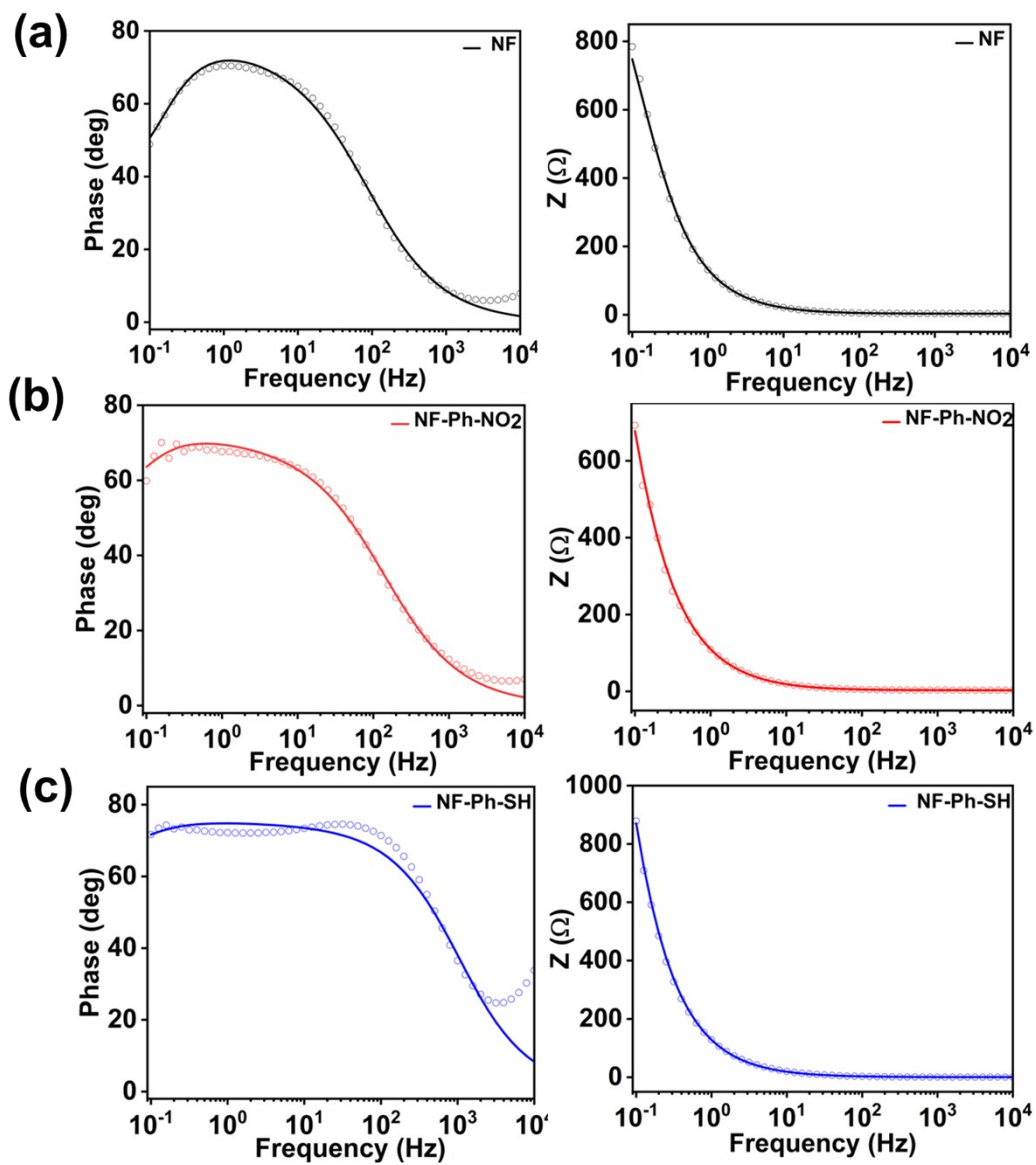

Fig. S5. Fitted Bode plot of (a) NF (b) NF-Ph-NO<sub>2</sub> and (c) NF-Ph-SH.

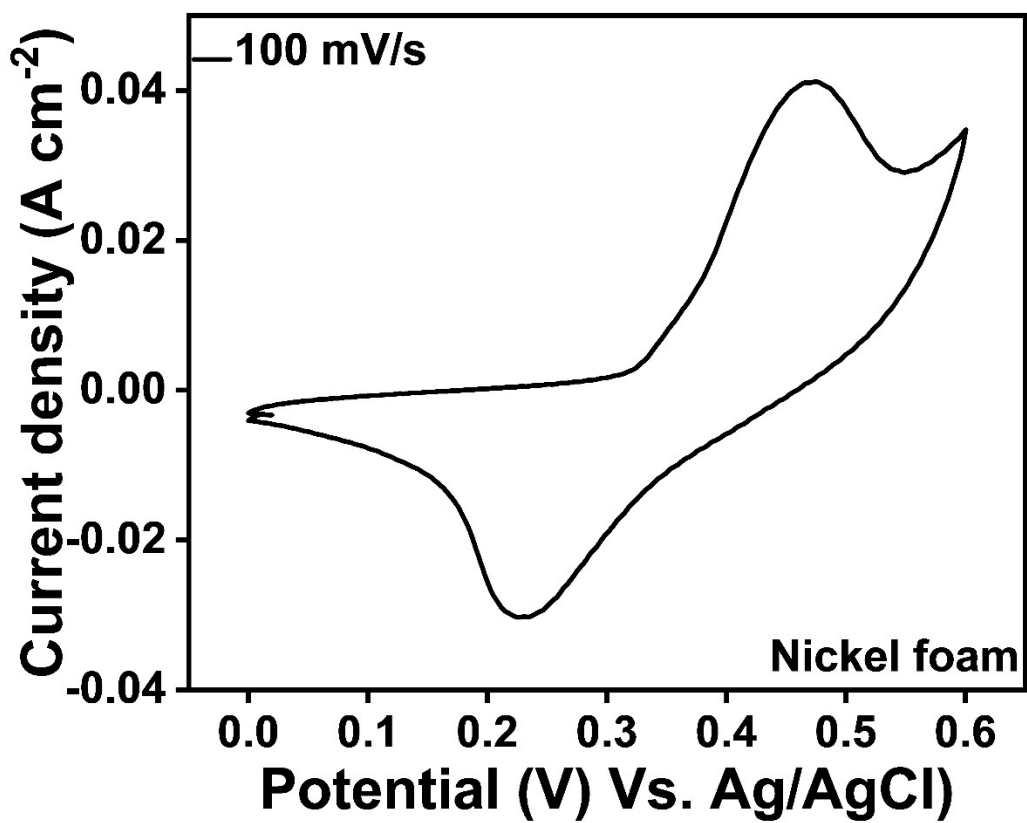

**Fig. S6.** The CV curves of blank nickel foam substrate at scan rate  $100 \text{ mV s}^{-1}$ .

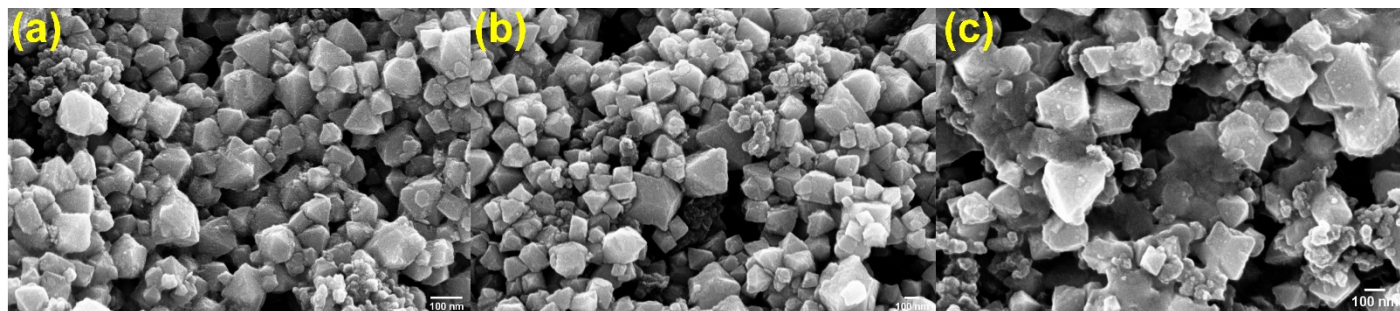

**Fig. S7.** FESEM image of (a) NF, (b) NF-Ph-NO<sub>2</sub> and (c) NF-Ph-SH after 2000 CV cycles.

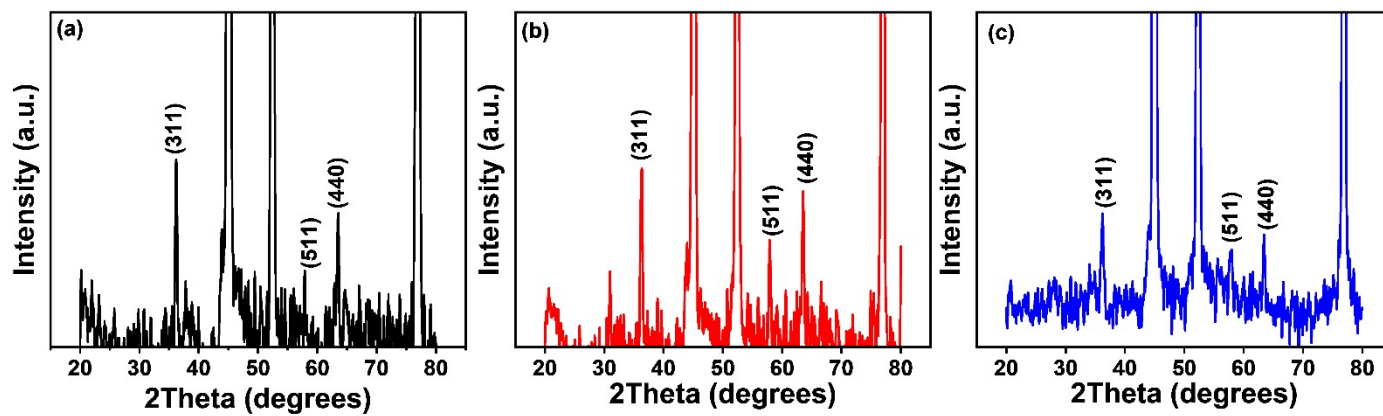

Fig. S8. PXRD pattern of (a) NF, (b) NF-Ph-NO<sub>2</sub> and (c) NF-Ph-SH after 2000 CV cycles (The high intensity peaks crossing the y-axis are from Ni-foam).
